# Supplementary material
Source: PubMed Central journal article supplement (PMC6575568)
Supplement: pnas.1817174116.sapp.pdf [file pnas.1817174116.sapp.pdf]

1 **Appendix 1. Supplementary Text**

2

3 #####

4 # Jags model for mark-recapture data #

5 #####

6

7 # OBSERVATIONS (OBS)

8 # 1 detected

9 # 0 not detected

10

11 # STATES (ALIVE): latent variable except on first capture

12 # 1 alive

13 # 0 dead (never observed)

14

15 model {

16 #####

17 ### PRIORS ###

18 #####

19 ## fixed effects

20 beta[1] ~ dnorm(0.0, 0.4444444) # survival (logit scale)

21 gamma[1] ~ dnorm(0.0, 0.4444444) # detection (logit scale)

22 beta[2] ~ dnorm(0.0, 4.0) # HWI effect

23 gamma[2] ~ dnorm(0.0, 4.0) # trap happiness effect

24 beta[3] ~ dnorm(0.0, 4.0) # group size effect

25

```

26  ## random effects
27  # year effect on detection probability
28  sigma_year ~ dnorm(0.0, 4.0)T(0.0,);
29  tau_year <- 1/(sigma_year * sigma_year);
30  for(k in 1:n_year) {
31    etap[k] ~ dnorm(0.0, tau_year)
32  }
33  # group
34  sigma_group ~ dnorm(0.0, 4.0)T(0.0,)
35  tau_group <- 1 / (sigma_group * sigma_group)
36  for(k in 1:n_group) {
37    etag[k] ~ dnorm(0.0, tau_group)
38  }
39  #####
40  ### LIKELIHOOD ###
41  #####
42  for (i in 1:n_ind) {
43    ## initial condition
44    # Survival
45    ps[i, FIRST[i]] <- 1
46    # Detection
47    po[i, FIRST[i]] <- 1
48    ## rest of the process
49    for(t in (FIRST[i] + 1):n_year) {
50      # survival

```

```

51     ps[i, t] <- ilogit(beta[1] + beta[2] * HWI[i] + beta[3] * SIZE[i]) * ALIVE[i, t - 1] #
52 conditional on survival at (t-1), survival proba at t
53     # Detection: trap-dependence
54     po[i, t] <- ilogit(gamma[1] + gamma[2] * OBS[i, t - 1] + etap[t] + etag[GROUP[i]]) *
55 FIELDWORK[t] # conditional on fieldwork at t; is structurally 0 if no fieldwork
56 }
57 ## observation and state
58 for(t in FIRST[i]:n_year) {
59     ALIVE[i, t] ~ dbern(ps[i, t])
60     OBS[i, t] ~ dbern(po[i, t] * ALIVE[i, t]) # can only be detected if i is alive at t
61     ### log posterior probability density for WAIC
62     log_lik[CUMUL[i] + t - FIRST[i]] <- OBS[i, t] * log(po[i, t]*ps[i, t]) + (1 - OBS[i, t]) *
63 log(1 - po[i, t]*ps[i, t])
64 }
65 }
66 }
67 Jags Code to fit Model M10.
68
69

```

70 Table S1-1: Posterior estimates of detection probabilities from model M10.

71

| Year | Not detected at (t-1) |       |       | Detected at (t-1) |       |       |
|------|-----------------------|-------|-------|-------------------|-------|-------|
|      | Lower                 | Mean  | Upper | Lower             | Mean  | Upper |
| 1988 | 0.631                 | 0.836 | 0.991 | 0.690             | 0.863 | 0.991 |
| 1989 | 0.256                 | 0.486 | 0.731 | 0.326             | 0.536 | 0.755 |
| 1990 | 0.397                 | 0.612 | 0.817 | 0.460             | 0.659 | 0.836 |
| 1991 | 0.000                 | 0.000 | 0.000 | 0.000             | 0.000 | 0.000 |
| 1992 | 0.000                 | 0.000 | 0.000 | 0.000             | 0.000 | 0.000 |
| 1993 | 0.000                 | 0.012 | 0.031 | 0.000             | 0.015 | 0.043 |
| 1994 | 0.000                 | 0.014 | 0.037 | 0.000             | 0.018 | 0.049 |
| 1995 | 0.000                 | 0.000 | 0.000 | 0.000             | 0.000 | 0.000 |
| 1996 | 0.001                 | 0.017 | 0.044 | 0.000             | 0.021 | 0.056 |
| 1997 | 0.000                 | 0.010 | 0.031 | 0.000             | 0.013 | 0.040 |
| 1998 | 0.463                 | 0.675 | 0.868 | 0.506             | 0.717 | 0.902 |
| 1999 | 0.015                 | 0.069 | 0.141 | 0.018             | 0.083 | 0.160 |
| 2000 | 0.224                 | 0.402 | 0.592 | 0.260             | 0.453 | 0.657 |
| 2001 | 0.001                 | 0.015 | 0.038 | 0.001             | 0.018 | 0.047 |
| 2002 | 0.016                 | 0.074 | 0.142 | 0.017             | 0.092 | 0.187 |
| 2003 | 0.149                 | 0.317 | 0.508 | 0.157             | 0.364 | 0.584 |
| 2004 | 0.062                 | 0.163 | 0.277 | 0.079             | 0.193 | 0.311 |
| 2005 | 0.618                 | 0.774 | 0.911 | 0.663             | 0.807 | 0.942 |
| 2006 | 0.309                 | 0.499 | 0.686 | 0.384             | 0.550 | 0.712 |
| 2007 | 0.703                 | 0.820 | 0.927 | 0.747             | 0.849 | 0.935 |
| 2008 | 0.638                 | 0.780 | 0.912 | 0.702             | 0.815 | 0.918 |
| 2009 | 0.885                 | 0.954 | 0.998 | 0.910             | 0.963 | 0.999 |
| 2010 | 0.658                 | 0.812 | 0.938 | 0.732             | 0.844 | 0.940 |
| 2011 | 0.596                 | 0.755 | 0.900 | 0.671             | 0.793 | 0.912 |
| 2012 | 0.864                 | 0.939 | 0.994 | 0.896             | 0.952 | 0.993 |
| 2013 | 0.846                 | 0.938 | 0.996 | 0.889             | 0.952 | 0.996 |
| 2014 | 0.700                 | 0.850 | 0.974 | 0.764             | 0.877 | 0.975 |

72

73
